# Supplementary material for: Theoretical study of the solvation of HgCl2, HgClOH, Hg(OH)2 and HgCl3−: a density functional theory cluster approach
Source: Royal Society of Chemistry journal article supplement (doi:10.1039/c1cp22154j), 2011-01-01

# Theoretical study of the solvation of $\text{HgCl}_2$ , $\text{HgClOH}$ , $\text{Hg}(\text{OH})_2$ and $\text{HgCl}_3^-$ . A Density Functional Theory cluster approach.

Ludovic Castro<sup>1</sup>, Aurélien Dommergue<sup>2</sup>, Alexandre Renard<sup>2</sup>, Christophe Ferrari<sup>2</sup>, Alejandro Ramirez-Solis<sup>3</sup>, Laurent Maron<sup>1</sup>

<sup>1</sup> Université de Toulouse, INSA, UPS, LPCNO, 135 avenue de Rangueil, F-31077 Toulouse, France

<sup>2</sup> Laboratoire de Glaciologie et Géophysique de l'Environnement, CNRS/Université Joseph Fourier Grenoble I, 54 rue Molière 38402 Saint Martin d'Hères, France

<sup>3</sup> Depto. De Fisica, Facultad de Ciencias, Universidad Autonoma del Estado de Morelos Cuernavaca, Morelos 62290, Mexico

---

$\text{HgCl}_2$

E = -183.697817

G = -183.723649

|    |          |           |           |
|----|----------|-----------|-----------|
| Hg | 0.000000 | 0.009525  | -0.000257 |
| Cl | 0.000000 | -0.000692 | 2.296746  |
| Cl | 0.000000 | 0.091167  | -2.296489 |

$\text{H}_2\text{O}$

E = -76.391210

G = -76.387923

|   |           |          |           |
|---|-----------|----------|-----------|
| O | -0.023593 | 0.000000 | -0.016682 |
| H | 0.021655  | 0.000000 | 0.944399  |
| H | 0.897608  | 0.000000 | -0.294380 |

HgCl<sub>2</sub> with 1 water molecule

E = -260.106155

G = -260.115806

|    |           |           |           |
|----|-----------|-----------|-----------|
| O  | -0.755296 | 0.486146  | 0.097560  |
| Hg | -0.057554 | -2.037953 | 0.129724  |
| Cl | 1.657926  | -1.544246 | -1.354730 |
| Cl | -1.711573 | -2.780155 | 1.569908  |
| H  | -0.334261 | 0.925532  | -0.650618 |
| H  | -1.690837 | 0.713644  | 0.058110  |

HgCl<sub>2</sub> with 2 water molecules

E = -336.519143

G = -336.505844

|    |           |           |           |
|----|-----------|-----------|-----------|
| O  | -0.716272 | 0.487434  | 0.108527  |
| Hg | -0.031643 | -1.916158 | 0.088226  |
| Cl | 1.768436  | -1.611869 | -1.386575 |
| Cl | -1.632029 | -2.681235 | 1.590549  |
| H  | -1.182038 | 0.776432  | 0.900275  |
| H  | 0.097965  | 1.036646  | 0.015372  |
| O  | 1.706927  | 1.560681  | -0.376768 |
| H  | 2.356621  | 1.515654  | 0.333501  |
| H  | 1.946418  | 0.832414  | -0.971520 |

HgCl<sub>2</sub> with 3 water molecules

E = -412.930792

G = -412.897195

|    |           |           |           |
|----|-----------|-----------|-----------|
| O  | -0.305204 | 1.411946  | -0.734723 |
| Hg | -0.943014 | -2.069033 | -2.529435 |
| O  | 1.549209  | -0.274399 | -1.867058 |
| Cl | -1.841731 | -1.708903 | -4.657933 |
| Cl | 0.250350  | -2.925181 | -0.684770 |
| H  | -0.169868 | 1.368334  | 0.217749  |
| H  | 0.469718  | 0.964301  | -1.130002 |
| H  | 2.326522  | -0.237748 | -2.433298 |
| H  | 1.593941  | -1.108398 | -1.372368 |
| O  | -2.246723 | -0.236516 | -1.498663 |
| H  | -1.590665 | 0.444491  | -1.189177 |
| H  | -2.747516 | 0.173948  | -2.213701 |

Alternate structure for HgCl<sub>2</sub> with 3 water molecules

E = -412.930152

G = -412.895713

|    |           |           |           |
|----|-----------|-----------|-----------|
| O  | -0.798667 | 0.586856  | -0.121885 |
| Hg | -0.128062 | -1.706594 | 0.152656  |
| Cl | 1.832697  | -1.688511 | -1.151174 |
| Cl | -1.840980 | -2.414049 | 1.605629  |
| O  | 1.674095  | 1.605618  | -0.640763 |
| H  | -1.297690 | 0.885661  | 0.670913  |
| H  | 0.006794  | 1.138055  | -0.237496 |
| H  | 2.300245  | 1.660162  | 0.089373  |
| H  | 1.931421  | 0.801353  | -1.117937 |
| O  | -2.305000 | 0.863790  | 2.127026  |
| H  | -2.599424 | -0.058532 | 2.074522  |
| H  | -1.832756 | 0.914562  | 2.965266  |

HgCl<sub>2</sub> with 4 water molecules

E = -489.347057

G = -489.288983

|    |           |           |           |
|----|-----------|-----------|-----------|
| O  | 0.331540  | 1.890423  | -0.346235 |
| Hg | -0.297327 | -0.055629 | -1.746800 |
| Cl | 1.834559  | -0.935274 | -2.202133 |
| Cl | -2.616217 | 0.473045  | -1.837675 |
| O  | 1.486065  | 0.236085  | 1.384474  |
| H  | -0.437274 | 2.338281  | 0.023437  |
| H  | 0.787034  | 1.417842  | 0.400691  |
| H  | 0.873666  | -0.511442 | 1.229358  |
| H  | 2.294527  | -0.012713 | 0.920033  |
| O  | -0.416758 | -1.571838 | 0.479615  |
| H  | -0.185028 | -2.473519 | 0.231335  |
| H  | -1.382763 | -1.569145 | 0.712633  |
| O  | -3.039318 | -1.347285 | 0.801791  |
| H  | -3.193596 | -0.860248 | -0.027626 |
| H  | -3.322000 | -0.746337 | 1.499845  |

HgCl<sub>2</sub> with 6 water molecules

E = -642.173960

G = -642.070964

|    |           |           |           |
|----|-----------|-----------|-----------|
| O  | 0.541667  | 1.745816  | -0.178269 |
| Hg | -0.272059 | -0.068325 | -1.429274 |
| O  | -0.224670 | -1.563282 | 0.599687  |
| Cl | 1.491065  | -1.129092 | -2.661731 |
| Cl | -2.672540 | 0.443003  | -1.423706 |
| O  | 1.235441  | 0.299025  | 1.945171  |
| O  | -2.861771 | -1.622700 | 1.070991  |
| H  | -0.220803 | 2.342711  | 0.013192  |
| H  | 0.843667  | 1.342442  | 0.678576  |
| H  | 0.765163  | -0.500644 | 1.621970  |

|   |           |           |           |
|---|-----------|-----------|-----------|
| H | 2.170684  | 0.069744  | 1.945690  |
| H | 0.139424  | -2.415726 | 0.249955  |
| H | -1.171353 | -1.699061 | 0.857280  |
| H | -3.102128 | -1.083465 | 0.297261  |
| H | -3.093550 | -1.077090 | 1.831006  |
| O | 0.914553  | -3.616341 | -0.688992 |
| H | 0.310868  | -4.182458 | -1.182775 |
| H | 1.319345  | -3.041882 | -1.364326 |
| O | -1.742653 | 3.187061  | 0.018276  |
| H | -2.298816 | 2.487784  | -0.365999 |
| H | -1.729824 | 3.883810  | -0.647602 |

HgCl<sub>2</sub> with 8 water molecules

E = -794.999580

G = -794.849799

|    |           |           |           |
|----|-----------|-----------|-----------|
| O  | 0.930523  | 1.736446  | 0.245278  |
| Hg | 0.580337  | -0.047658 | -1.503630 |
| Cl | -1.617898 | 0.537888  | -2.413180 |
| O  | -0.263710 | -1.353276 | 0.490731  |
| Cl | 2.640463  | -1.305958 | -1.559088 |
| O  | 1.781905  | -0.183078 | 1.841097  |
| O  | -0.020837 | -3.557825 | -0.959633 |
| O  | -2.731216 | -0.375669 | 0.996701  |
| O  | -1.844578 | 2.199138  | 0.252730  |
| H  | 0.027977  | 2.013232  | 0.489591  |
| H  | 1.282150  | 1.135649  | 0.961863  |
| H  | 1.065236  | -0.781672 | 1.531753  |
| H  | 2.576141  | -0.529284 | 1.415557  |
| H  | -0.263499 | -2.254385 | 0.066843  |
| H  | -1.191893 | -1.102145 | 0.724457  |
| H  | -3.286196 | -0.595767 | 0.240015  |
| H  | -2.548437 | 0.577860  | 0.896904  |

|   |           |           |           |
|---|-----------|-----------|-----------|
| H | -0.484922 | -3.344995 | -1.797520 |
| H | 0.918056  | -3.471879 | -1.172380 |
| H | -1.877435 | 1.935809  | -0.687739 |
| H | -2.260137 | 3.066536  | 0.308643  |
| O | 1.884205  | 2.083839  | -2.297614 |
| H | 2.778281  | 1.738076  | -2.407696 |
| H | 1.806804  | 2.312897  | -1.353630 |
| O | -1.314903 | -2.649719 | -3.244892 |
| H | -1.623740 | -1.745095 | -3.077535 |
| H | -0.820687 | -2.594244 | -4.069788 |

HgCl<sub>2</sub> with 12 water molecules

E = -1100.639946

G = -1100.402440

|    |           |           |           |
|----|-----------|-----------|-----------|
| O  | 0.980417  | 1.837492  | 0.601973  |
| Hg | 0.473288  | 0.827176  | -1.555201 |
| O  | 1.951659  | 3.036794  | -1.661852 |
| Cl | -1.653672 | 1.913566  | -2.121002 |
| O  | -0.500831 | -1.080526 | -0.300109 |
| Cl | 2.395087  | -0.302975 | -2.570822 |
| O  | 1.463155  | -0.400719 | 1.746534  |
| O  | 0.069114  | -3.574284 | -0.342816 |
| O  | -2.766493 | -0.066473 | 0.738372  |
| O  | -0.709754 | -4.186650 | -2.922797 |
| O  | -1.687891 | 2.562021  | 0.918605  |
| H  | 0.117947  | 2.173178  | 0.919412  |
| H  | 1.211801  | 1.019718  | 1.160239  |
| H  | 0.783133  | -0.880670 | 1.241471  |
| H  | 2.317928  | -0.710876 | 1.371651  |
| H  | -0.318519 | -2.086895 | -0.295845 |
| H  | -1.348711 | -0.852700 | 0.157253  |
| H  | -3.307873 | 0.060956  | -0.049856 |

|   |           |           |           |
|---|-----------|-----------|-----------|
| H | -2.488154 | 0.835094  | 0.986238  |
| H | -0.488172 | -4.006844 | -1.017392 |
| H | 0.943300  | -3.610750 | -0.798390 |
| H | -1.785048 | 2.655540  | -0.050806 |
| H | -2.033442 | 3.370620  | 1.312081  |
| H | 2.807591  | 2.711684  | -1.964251 |
| H | 1.935581  | 2.894590  | -0.698667 |
| H | -1.148534 | -3.300762 | -3.047592 |
| H | -1.219718 | -4.828496 | -3.424774 |
| O | -0.589894 | 0.001441  | -4.749530 |
| H | 0.373032  | 0.028239  | -4.688137 |
| H | -0.892656 | 0.883496  | -4.495196 |
| O | -1.759029 | -1.771109 | -2.953094 |
| H | -1.455564 | -1.428512 | -2.096724 |
| H | -1.385974 | -1.159651 | -3.622525 |
| O | 3.751987  | -1.050562 | 0.369314  |
| H | 3.461262  | -1.025699 | -0.556210 |
| H | 4.441671  | -0.381220 | 0.428381  |
| O | 1.951860  | -3.689227 | -2.296235 |
| H | 2.144310  | -2.783058 | -2.572377 |
| H | 1.148325  | -3.940905 | -2.792054 |

HgCl<sub>2</sub> with 24 water molecules (equatorial)

E = -2017.607919

G = -2017.083756

|   |           |           |           |
|---|-----------|-----------|-----------|
| O | 0.012099  | -0.248917 | -5.580104 |
| O | 1.179590  | 2.033464  | -4.712322 |
| O | 0.755810  | -2.786294 | -6.063833 |
| O | 1.269634  | 4.648350  | -3.920258 |
| O | -2.741806 | -0.124987 | -5.659232 |
| O | -1.422012 | -1.313668 | -3.503818 |
| O | -0.853038 | -3.822009 | -4.000709 |

|    |           |           |           |
|----|-----------|-----------|-----------|
| O  | -0.710874 | -0.827059 | -0.938486 |
| Hg | 0.926415  | 1.048630  | -1.268171 |
| O  | 0.924019  | 1.337547  | 0.984848  |
| O  | 2.147886  | 3.117107  | -1.754096 |
| Cl | -1.147905 | 2.131589  | -2.392022 |
| Cl | 2.446240  | -0.627122 | -2.352824 |
| O  | 2.015480  | -0.845070 | 1.516402  |
| O  | 3.851933  | 2.443584  | -3.592818 |
| O  | -2.764641 | 0.021176  | 0.482234  |
| O  | -1.480100 | 2.580930  | 0.823959  |
| O  | 4.308277  | 0.456738  | 1.048942  |
| O  | 3.218461  | 2.674926  | 2.114542  |
| O  | 0.770244  | -2.857660 | -0.021587 |
| O  | 1.150232  | -4.327277 | -2.155551 |
| O  | -0.311987 | 5.064147  | 0.555758  |
| O  | -0.791626 | 5.342626  | -2.070039 |
| O  | 2.590510  | 4.795436  | 0.483430  |
| O  | -4.070150 | 0.713124  | -1.852664 |
| H  | -0.897669 | -0.139585 | -5.926899 |
| H  | 0.339431  | -1.137842 | -5.881275 |
| H  | 0.901542  | 1.268938  | -5.268707 |
| H  | 0.512284  | 1.996829  | -4.007076 |
| H  | -1.460922 | -0.553325 | -0.332924 |
| H  | -3.363300 | 0.262303  | -0.258385 |
| H  | -0.237239 | -1.605497 | -0.545506 |
| H  | 0.395745  | -3.474707 | 0.615706  |
| H  | 0.991544  | -3.402118 | -0.838352 |
| H  | -1.220441 | -1.100738 | -2.558494 |
| H  | 0.370774  | -4.247401 | -2.745645 |
| H  | -0.732359 | -0.867815 | -4.050930 |
| H  | 1.888921  | -4.070110 | -2.733884 |
| H  | -1.151764 | -2.896165 | -3.762962 |
| H  | -1.644537 | -4.364885 | -4.068354 |
| H  | -2.543859 | 0.860158  | 0.915239  |
| H  | 1.793223  | -1.576619 | 0.909939  |



|   |           |           |           |
|---|-----------|-----------|-----------|
| H | 2.929834  | -0.516246 | 1.296946  |
| H | -1.145115 | 3.500971  | 0.933876  |
| H | -1.534823 | 2.491758  | -0.143027 |
| H | -0.000310 | 1.604152  | 1.191285  |
| H | 1.211863  | 0.397089  | 1.306716  |
| H | 4.051437  | 1.327569  | 1.450650  |
| H | 4.631213  | 0.669331  | 0.161184  |
| H | 2.918474  | 2.868044  | -2.352171 |
| H | 1.629668  | 3.699604  | -2.349394 |
| H | 2.578276  | 4.250462  | -0.323575 |
| H | 1.644739  | 4.927537  | 0.670408  |
| H | -0.619651 | 5.860117  | 1.001890  |
| H | -0.438043 | 5.232819  | -0.416600 |
| H | -1.226944 | 4.498286  | -2.265152 |
| H | -0.068818 | 5.360885  | -2.722497 |
| H | 1.183760  | 3.852854  | -4.489040 |
| H | 2.128145  | 5.027857  | -4.138384 |
| H | 4.441268  | 1.785613  | -3.177379 |
| H | 3.157456  | 1.962027  | -4.076920 |
| H | -3.267617 | 0.951487  | -2.342913 |
| H | -4.604468 | 1.514411  | -1.861469 |
| H | 2.333114  | 2.305326  | 1.972894  |
| H | 3.170638  | 3.511979  | 1.600255  |
| H | -2.622564 | -0.513822 | -4.772318 |
| H | -3.262798 | -0.767863 | -6.150461 |
| H | 1.598978  | -2.936547 | -5.601456 |
| H | 0.121804  | -3.284391 | -5.512333 |
| O | 2.834229  | -3.159267 | -4.152186 |
| H | 2.749232  | -2.289987 | -3.717422 |
| H | 3.777637  | -3.296295 | -4.288604 |
| O | 5.165448  | 0.696772  | -1.819255 |
| H | 4.435862  | 0.052210  | -1.902748 |
| H | 5.984721  | 0.192442  | -1.865753 |

HgCl<sub>2</sub> with 24 water molecules (apical)

E = -2017.617607

G = -2017.088672

|    |           |           |           |
|----|-----------|-----------|-----------|
| O  | 0.639246  | 2.075238  | 1.877741  |
| O  | 1.429773  | 2.370562  | -0.565386 |
| Hg | 0.157191  | 0.638883  | -1.550188 |
| O  | -0.275871 | -0.168881 | -3.792349 |
| Cl | 1.970987  | -1.108354 | -1.446588 |
| Cl | -1.713288 | 2.259258  | -1.550246 |
| O  | -1.059665 | -1.238824 | -0.138390 |
| O  | 3.846501  | 2.083960  | -1.632373 |
| O  | -3.368032 | -0.307115 | 0.695277  |
| O  | -0.597180 | -3.881595 | -0.109174 |
| O  | -1.233136 | 1.756836  | -5.095897 |
| O  | 0.866537  | -0.604849 | 2.104318  |
| O  | 3.022247  | 1.889791  | -4.165830 |
| O  | 0.801572  | 3.515933  | -4.439165 |
| O  | 1.233520  | 4.684950  | -2.181862 |
| O  | 1.270055  | -4.082332 | -2.338579 |
| O  | 5.366548  | -0.130808 | -0.775210 |
| O  | -4.039655 | 0.254901  | -2.143616 |
| O  | 2.262306  | -0.788458 | -4.519001 |
| O  | -2.136127 | -1.736541 | -2.685193 |
| O  | -1.488929 | -4.325884 | -2.700382 |
| O  | 3.648686  | -1.276325 | 1.075583  |
| O  | -2.228255 | 2.202297  | 1.511986  |
| H  | -0.324244 | 2.216208  | 1.901769  |
| H  | 0.748553  | 1.114839  | 2.081034  |
| H  | 0.301554  | -0.908582 | 1.373086  |
| H  | 1.776881  | -0.842365 | 1.870789  |
| H  | -0.886193 | -2.216051 | -0.030367 |
| H  | -1.933602 | -0.985874 | 0.283439  |
| H  | -3.825811 | -0.102646 | -0.140535 |

|   |           |           |           |
|---|-----------|-----------|-----------|
| H | -3.134798 | 0.552555  | 1.093732  |
| H | -1.187020 | -4.229500 | -0.803463 |
| H | 0.274623  | -4.070479 | -0.495406 |
| H | -2.088014 | 2.424938  | 0.569721  |
| H | -2.727098 | 2.937459  | 1.885450  |
| H | 2.389323  | 2.218992  | -0.768126 |
| H | 1.222167  | 2.305701  | 0.423633  |
| H | -1.841160 | -3.409439 | -2.831367 |
| H | -2.030709 | -4.922395 | -3.225129 |
| H | 0.574328  | -0.468436 | -4.204006 |
| H | -0.663043 | 0.608721  | -4.356917 |
| H | -1.781261 | -1.588535 | -1.778625 |
| H | -1.487291 | -1.251557 | -3.256497 |
| H | 3.076297  | -1.357087 | 0.283442  |
| H | 3.862957  | -2.181866 | 1.330521  |
| H | 1.303110  | -3.131992 | -2.140550 |
| H | 0.368010  | -4.238698 | -2.685340 |
| H | 0.897425  | 4.010672  | -3.556573 |
| H | 0.894223  | 4.182927  | -5.127711 |
| H | 2.203995  | 4.849754  | -2.136657 |
| H | 1.082859  | 3.997780  | -1.505875 |
| H | 2.455536  | -0.749667 | -3.566411 |
| H | 2.515886  | -1.736402 | -4.711866 |
| H | 4.425115  | 1.346905  | -1.353413 |
| H | 3.563764  | 1.914046  | -2.572420 |
| H | -3.345807 | 0.917676  | -1.961241 |
| H | -3.526265 | -0.528763 | -2.434035 |
| H | 6.260622  | 0.054721  | -0.469105 |
| H | 4.879200  | -0.498147 | -0.004632 |
| H | -0.705651 | 2.527175  | -4.798734 |
| H | -2.177013 | 1.889567  | -4.848041 |
| H | 2.236684  | 2.460037  | -4.329764 |
| H | 2.815167  | 1.026227  | -4.564779 |
| O | 5.155241  | -1.726759 | -3.174199 |
| H | 5.208771  | -1.276584 | -2.311870 |

|   |           |           |           |
|---|-----------|-----------|-----------|
| H | 5.014267  | -1.016085 | -3.808851 |
| O | -3.925649 | 1.762224  | -4.551511 |
| H | -4.366861 | 1.332212  | -5.290598 |
| H | -4.147321 | 1.223441  | -3.765955 |
| O | 3.990414  | 4.788866  | -2.085985 |
| H | 4.129192  | 3.859921  | -1.806461 |
| H | 4.331155  | 4.818369  | -2.986068 |
| O | 3.134929  | -3.282398 | -4.400439 |
| H | 2.548166  | -3.739423 | -3.768722 |
| H | 3.902824  | -2.990807 | -3.871800 |

### Optimized clathrate

E = -1833.801575

G = -1833.277814

|   |           |           |           |
|---|-----------|-----------|-----------|
| O | 0.166223  | 1.848823  | 0.940406  |
| H | -0.447022 | 1.542747  | 0.198435  |
| H | -0.190752 | 1.323453  | 1.675916  |
| O | 3.715424  | -0.808833 | -3.238236 |
| H | 3.910368  | 0.017891  | -2.731287 |
| H | 3.616448  | -1.543249 | -2.590016 |
| O | 2.416923  | 0.554143  | 0.409486  |
| H | 1.633714  | 1.134572  | 0.621762  |
| H | 3.073875  | 0.723348  | 1.093613  |
| O | 3.727614  | 1.558156  | -1.931573 |
| H | 3.091197  | 2.028744  | -2.499038 |
| H | 3.221821  | 1.287957  | -1.143929 |
| O | -0.756092 | 4.455559  | 0.476519  |
| H | -1.305897 | 4.730818  | 1.216944  |
| H | -0.327815 | 3.626920  | 0.771538  |
| H | 1.378994  | 1.328351  | -3.619606 |
| O | 1.546687  | 2.290263  | -3.740206 |
| H | 1.829838  | 2.326036  | -4.687247 |

|   |           |           |           |
|---|-----------|-----------|-----------|
| H | -0.002131 | 2.941517  | -3.757700 |
| O | -0.954998 | 3.211376  | -3.880489 |
| H | -0.933141 | 4.073116  | -4.308720 |
| O | 1.993625  | 1.987758  | -6.418893 |
| H | 1.499289  | 1.153427  | -6.565419 |
| H | 1.601047  | 2.622924  | -7.025000 |
| O | -2.407123 | 3.321616  | -1.450555 |
| H | -1.929851 | 3.338358  | -2.303859 |
| H | -1.855213 | 3.850271  | -0.834683 |
| H | -1.612169 | 1.746452  | -4.868801 |
| O | -1.802906 | 0.836794  | -5.171092 |
| H | -1.802467 | 0.325796  | -4.333488 |
| O | -1.710573 | 0.949512  | -0.608147 |
| H | -2.140513 | 1.805723  | -0.912056 |
| H | -1.534306 | 0.418639  | -1.426582 |
| O | -1.233455 | -0.477430 | -2.809202 |
| H | -1.461339 | -1.437858 | -2.747559 |
| H | -0.273955 | -0.460577 | -3.023488 |
| O | -2.564338 | -3.865962 | -5.114066 |
| H | -3.245966 | -3.234647 | -5.367334 |
| H | -1.771784 | -3.598362 | -5.628963 |
| O | -1.504012 | -3.134573 | -2.770504 |
| H | -1.549484 | -3.597272 | -1.902221 |
| O | -0.941161 | -3.884921 | -0.280482 |
| H | -1.500764 | -3.702164 | 0.498237  |
| H | -0.292483 | -3.162672 | -0.267801 |
| O | -1.849704 | -3.036731 | 2.210263  |
| H | -2.589746 | -3.183453 | 2.806139  |
| H | -1.772434 | -2.055075 | 2.055488  |
| O | 0.952491  | -3.190542 | -3.853493 |
| H | 1.110453  | -2.220165 | -3.784129 |
| H | 0.091465  | -3.305375 | -3.378510 |
| H | 0.780202  | -4.455687 | 1.640471  |
| O | 0.846466  | -3.717138 | 2.259032  |
| H | -0.089014 | -3.534782 | 2.484281  |

|   |           |           |           |
|---|-----------|-----------|-----------|
| H | 1.214260  | -2.420543 | 1.156998  |
| O | 1.055950  | -1.821995 | 0.383482  |
| H | 1.668682  | -1.050712 | 0.427767  |
| O | 2.881802  | -2.940806 | -1.707693 |
| H | 2.249293  | -2.618498 | -1.044562 |
| H | 2.326268  | -3.305187 | -2.419590 |
| O | -1.187511 | -0.588022 | 1.539624  |
| H | -1.668347 | -0.126527 | 0.814007  |
| H | -0.398328 | -0.963249 | 1.087241  |
| O | -0.160330 | -3.008576 | -6.254651 |
| H | 0.227235  | -3.600510 | -6.908479 |
| H | 0.355421  | -3.160862 | -5.410121 |
| H | -2.047420 | -3.554855 | -3.479452 |
| O | 0.347984  | -0.196256 | -6.295008 |
| H | -0.512833 | 0.197488  | -5.962286 |
| H | 0.163459  | -1.126061 | -6.528681 |
| O | 1.298630  | -0.463900 | -3.805539 |
| H | 1.106679  | -0.387328 | -4.775539 |
| H | 2.321129  | -0.588198 | -3.639068 |

HgClOH with 24 water molecules (equatorial)

E = -2078.353974

G = -2077.809715

|    |           |           |            |
|----|-----------|-----------|------------|
| O  | -0.523982 | -0.375863 | -6.081609  |
| O  | 1.293288  | -2.239869 | -5.781290  |
| O  | 1.253044  | 1.382504  | -5.028205  |
| O  | 2.219337  | 2.811934  | -7.016835  |
| Hg | 0.720866  | 2.318727  | -9.136733  |
| O  | -0.868458 | 3.371222  | -8.082096  |
| Cl | 1.869536  | 0.108848  | -9.479011  |
| O  | 1.939259  | 4.009414  | -10.160006 |
| O  | -0.656916 | 1.876990  | -11.177397 |

|   |           |           |            |
|---|-----------|-----------|------------|
| O | 3.184981  | -2.175510 | -7.856361  |
| O | 4.385979  | 3.399877  | -10.086653 |
| O | 2.817144  | 0.000991  | -12.489631 |
| O | 4.120483  | 2.597497  | -12.610001 |
| O | 3.006681  | -0.494187 | -4.450759  |
| O | 1.809826  | 5.394457  | -6.588397  |
| O | 2.173194  | 4.419342  | -12.967984 |
| O | 0.332587  | 5.764664  | -8.951528  |
| O | 0.062235  | -0.466052 | -12.323562 |
| O | -0.014334 | 3.114547  | -3.409389  |
| O | -0.579432 | 4.572048  | -5.529636  |
| O | -2.312497 | 1.097994  | -7.764690  |
| O | -3.137382 | 1.535524  | -10.191318 |
| O | -2.933295 | 4.303662  | -9.595966  |
| O | -1.420702 | 5.890963  | -11.047555 |
| O | 4.704664  | 1.989804  | -7.649586  |
| O | 4.892908  | -0.366249 | -6.495492  |
| O | -0.547009 | 4.018140  | -13.070033 |
| H | -1.192673 | -0.594989 | -5.422891  |
| H | 0.119401  | -1.149084 | -6.075953  |
| H | -1.677911 | 0.446982  | -7.418543  |
| H | -1.826062 | 1.959717  | -7.758844  |
| H | 2.161962  | 3.802761  | -6.880254  |
| H | 0.966850  | 5.281140  | -6.101290  |
| H | 3.155850  | 2.574243  | -7.237914  |
| H | 5.437790  | 2.503706  | -7.295030  |
| H | 4.795237  | 1.070422  | -7.258952  |
| H | 1.627424  | 1.939633  | -5.773391  |
| H | 4.338125  | -0.368281 | -5.688992  |
| H | 0.547424  | 0.818408  | -5.436282  |
| H | 4.506011  | -1.079432 | -7.033153  |
| H | 2.388580  | 0.277859  | -4.596918  |
| H | 3.226785  | -0.506849 | -3.514188  |
| H | 1.527183  | 5.816355  | -7.418498  |
| H | 4.549195  | 2.688204  | -9.444645  |

|   |           |           |            |
|---|-----------|-----------|------------|
| H | 4.401601  | 3.015811  | -11.009555 |
| H | -0.198864 | 6.055604  | -9.727591  |
| H | -0.184438 | 5.003035  | -8.606116  |
| H | 1.578886  | 4.811612  | -9.710378  |
| H | 2.943973  | 3.862411  | -10.015349 |
| H | 3.437347  | 3.257722  | -12.898268 |
| H | 3.677033  | 1.741845  | -12.713945 |
| H | -0.383581 | 1.046013  | -11.643709 |
| H | -1.596260 | 1.734955  | -10.907311 |
| H | -0.613047 | 3.242526  | -12.483953 |
| H | -0.811485 | 4.756851  | -12.492903 |
| H | -1.919761 | 6.663754  | -11.330140 |
| H | -2.074035 | 5.290715  | -10.580098 |
| H | -2.261064 | 4.030502  | -8.931275  |
| H | -3.222293 | 3.451728  | -9.968775  |
| H | -2.905762 | 1.211874  | -9.272132  |
| H | -3.807538 | 0.949459  | -10.554125 |
| H | 0.985427  | -0.333588 | -12.617436 |
| H | 0.159053  | -0.979396 | -11.512211 |
| H | -1.387180 | 5.084670  | -5.428791  |
| H | -0.448140 | 4.060998  | -4.683549  |
| H | 2.083386  | 4.483415  | -12.002524 |
| H | 1.247171  | 4.223487  | -13.233583 |
| H | 0.478515  | 2.420617  | -3.916253  |
| H | 0.652185  | 3.569101  | -2.883793  |
| H | 1.857710  | -2.404087 | -6.559407  |
| H | 1.900819  | -1.781291 | -5.165901  |
| H | 2.763882  | -1.454885 | -8.368171  |
| H | 3.384353  | -2.871733 | -8.491014  |
| H | 2.783428  | 0.083572  | -11.517827 |
| H | 3.489283  | -0.661949 | -12.681150 |
| H | -0.638387 | 3.614787  | -7.162976  |

HgClOH with 24 water molecules (apical)



E = -2078.354883

G = -2077.812145

|    |           |           |           |
|----|-----------|-----------|-----------|
| O  | 0.529695  | 2.156214  | 1.707434  |
| O  | 1.325157  | 2.460996  | -0.735116 |
| Hg | 0.086587  | 0.495692  | -1.450361 |
| O  | -1.131161 | -1.437027 | -0.072929 |
| O  | -0.313453 | -0.231521 | -3.801280 |
| Cl | 1.945053  | -1.112225 | -1.409467 |
| O  | -1.682839 | 1.684042  | -1.301718 |
| O  | -1.221091 | 1.816853  | -5.007683 |
| O  | -3.413345 | -0.425040 | 0.738930  |
| O  | 3.793565  | 2.148108  | -1.716584 |
| O  | 3.109972  | 1.857384  | -4.274523 |
| O  | -2.154767 | -1.823944 | -2.681087 |
| O  | -1.467230 | -4.393718 | -2.765630 |
| O  | -0.652940 | -4.087392 | -0.123351 |
| O  | 0.765780  | -0.537815 | 2.067596  |
| O  | 2.267258  | -0.798197 | -4.497553 |
| O  | 3.173761  | -3.277176 | -4.324072 |
| O  | 4.003376  | 4.845505  | -2.170010 |
| O  | -3.700447 | 2.299965  | -3.973059 |
| O  | 1.260732  | 4.730785  | -2.322437 |
| O  | 0.910970  | 3.524103  | -4.563713 |
| O  | 1.262957  | -4.100016 | -2.320191 |
| O  | -3.857599 | 0.362754  | -2.025107 |
| O  | 5.314710  | -0.020855 | -0.727868 |
| O  | 3.626956  | -1.206149 | 1.126305  |
| O  | 5.151570  | -1.670663 | -3.086640 |
| O  | -2.235836 | 2.104048  | 1.214987  |
| H  | -0.442884 | 2.259081  | 1.683345  |
| H  | 0.657376  | 1.208899  | 1.945615  |
| H  | 0.194534  | -0.940774 | 1.389563  |
| H  | 1.674660  | -0.804229 | 1.867705  |

|   |           |           |           |
|---|-----------|-----------|-----------|
| H | -0.975105 | -2.415546 | 0.023667  |
| H | -2.007602 | -1.170158 | 0.338333  |
| H | -3.828290 | -0.198733 | -0.115215 |
| H | -3.126771 | 0.435455  | 1.105154  |
| H | -1.221168 | -4.401590 | -0.850488 |
| H | 0.229679  | -4.229036 | -0.504774 |
| H | -2.047158 | 2.072985  | 0.233464  |
| H | -2.789013 | 2.876943  | 1.368334  |
| H | 2.285752  | 2.300986  | -0.919017 |
| H | 1.121469  | 2.410370  | 0.255634  |
| H | -1.831623 | -3.476072 | -2.864875 |
| H | -1.972816 | -4.969883 | -3.346196 |
| H | 0.539985  | -0.512099 | -4.210782 |
| H | -0.677298 | 0.565294  | -4.327868 |
| H | -1.818933 | -1.698025 | -1.764730 |
| H | -1.507822 | -1.320207 | -3.237311 |
| H | 3.057582  | -1.329981 | 0.339814  |
| H | 3.877032  | -2.094891 | 1.406046  |
| H | 1.269500  | -3.155640 | -2.096279 |
| H | 0.371969  | -4.265201 | -2.693491 |
| H | 1.007184  | 4.039887  | -3.689893 |
| H | 0.992611  | 4.173961  | -5.269673 |
| H | 2.224518  | 4.932104  | -2.268530 |
| H | 1.141159  | 4.029335  | -1.648781 |
| H | 2.435333  | -0.736943 | -3.542337 |
| H | 2.542667  | -1.744631 | -4.666251 |
| H | 4.366683  | 1.430123  | -1.383225 |
| H | 3.564101  | 1.943498  | -2.665691 |
| H | -3.041678 | 0.861906  | -1.749437 |
| H | -3.493943 | -0.463152 | -2.399582 |
| H | 6.199817  | 0.191364  | -0.413236 |
| H | 4.827310  | -0.388456 | 0.042752  |
| H | -0.584975 | 2.541608  | -4.833776 |
| H | -2.106172 | 2.069754  | -4.655919 |
| H | 2.336662  | 2.437073  | -4.454161 |

|   |           |           |           |
|---|-----------|-----------|-----------|
| H | 2.868181  | 0.976780  | -4.615249 |
| H | 5.202879  | -1.197549 | -2.236385 |
| H | 5.012422  | -0.977166 | -3.740434 |
| H | -4.384621 | 2.286541  | -4.648971 |
| H | -3.925736 | 1.572498  | -3.348867 |
| H | 4.107768  | 3.909793  | -1.894062 |
| H | 4.386130  | 4.877266  | -3.052851 |
| H | 2.575085  | -3.734845 | -3.703612 |
| H | 3.925405  | -2.972329 | -3.780608 |
| H | -1.549662 | 2.445281  | -1.881128 |

Hg(OH)<sub>2</sub> with 24 water molecules (equatorial)

E = -2139.089029

G = -2138.527932

|    |           |           |           |
|----|-----------|-----------|-----------|
| O  | -0.493702 | -0.123876 | -5.612375 |
| O  | 1.201760  | -2.039348 | -5.971373 |
| O  | -0.308990 | 2.578131  | -4.866499 |
| O  | 1.359180  | 4.430096  | -4.150192 |
| O  | -1.782234 | -1.695199 | -3.791600 |
| O  | -0.390724 | -3.824995 | -4.515516 |
| O  | -0.969571 | -1.044892 | -1.374551 |
| Hg | 0.835490  | 1.018434  | -1.776423 |
| O  | 2.301475  | -0.532541 | -1.825360 |
| O  | 0.939460  | 1.267690  | 0.661808  |
| O  | 2.513777  | 2.887388  | -2.247483 |
| O  | -0.837888 | 2.244307  | -2.196781 |
| O  | 1.861256  | -0.924879 | 1.708699  |
| O  | 4.992771  | 2.031439  | -2.869289 |
| O  | -2.755115 | 0.187374  | 0.155385  |
| O  | 0.954374  | -2.777931 | -0.489867 |
| O  | 1.609719  | -4.096478 | -2.616908 |
| O  | 4.222740  | 0.262910  | 1.703267  |

|   |           |           |           |
|---|-----------|-----------|-----------|
| O | 3.043782  | 2.646794  | 1.990824  |
| O | -1.368111 | 2.636588  | 0.538192  |
| O | 2.814918  | 4.580546  | 0.055222  |
| O | -0.023787 | 5.038132  | 0.378527  |
| O | -0.604184 | 4.993378  | -2.188895 |
| O | -4.313087 | -0.765859 | -3.725211 |
| O | -3.485342 | 1.273181  | -2.259578 |
| O | 4.778600  | -0.024207 | -1.122555 |
| O | 2.938522  | -1.985133 | -3.848770 |
| H | -1.030308 | -0.057682 | -6.410103 |
| H | 0.225917  | -0.807624 | -5.814046 |
| H | -0.173203 | 1.669173  | -5.192883 |
| H | -0.608860 | 2.460644  | -3.935609 |
| H | -1.609771 | -0.656978 | -0.712315 |
| H | -3.213564 | 0.608771  | -0.600374 |
| H | -0.406797 | -1.717788 | -0.933631 |
| H | 0.777830  | -3.373479 | 0.246114  |
| H | 1.197839  | -3.355346 | -1.285583 |
| H | -1.490275 | -1.451685 | -2.864402 |
| H | 0.851758  | -4.146723 | -3.235760 |
| H | -1.353273 | -1.042419 | -4.399744 |
| H | 2.236503  | -3.499110 | -3.073764 |
| H | -1.002391 | -3.096819 | -4.211316 |
| H | -0.942696 | -4.539232 | -4.848383 |
| H | -2.365701 | 0.944512  | 0.626108  |
| H | 1.874082  | -1.583945 | 1.003299  |
| H | 2.795796  | -0.556936 | 1.760708  |
| H | -1.002740 | 3.525007  | 0.744370  |
| H | -1.255081 | 2.581883  | -0.435298 |
| H | 0.054533  | 1.635587  | 0.881415  |
| H | 1.126944  | 0.396130  | 1.123537  |
| H | 3.930579  | 1.198417  | 1.873522  |
| H | 4.532735  | 0.279799  | 0.782611  |
| H | 3.429193  | 2.601292  | -2.493071 |
| H | 2.206486  | 3.496535  | -2.956688 |

|   |           |           |           |
|---|-----------|-----------|-----------|
| H | 2.766577  | 4.025774  | -0.744814 |
| H | 1.883172  | 4.778927  | 0.259647  |
| H | -0.255269 | 5.880108  | 0.782945  |
| H | -0.209230 | 5.135185  | -0.600295 |
| H | -0.834292 | 4.041630  | -2.232023 |
| H | 0.126048  | 5.065947  | -2.831035 |
| H | 0.791562  | 3.734687  | -4.594639 |
| H | 1.758578  | 4.972946  | -4.835441 |
| H | 5.096986  | 1.304002  | -2.214479 |
| H | 5.027402  | 1.603675  | -3.730179 |
| H | -4.015845 | 2.060201  | -2.417823 |
| H | -3.850093 | 0.555114  | -2.847248 |
| H | 2.210628  | 2.266650  | 1.661572  |
| H | 3.184019  | 3.386517  | 1.358387  |
| H | -3.438985 | -1.219553 | -3.818608 |
| H | -4.846958 | -1.349445 | -3.175990 |
| H | 1.917055  | -1.951460 | -5.305039 |
| H | 0.681117  | -2.799628 | -5.644726 |
| H | 2.674748  | -1.343997 | -3.107393 |
| H | 3.890075  | -1.906006 | -3.965298 |
| H | 3.820561  | -0.232892 | -1.331712 |
| H | 5.256956  | -0.858866 | -1.103502 |
| H | -1.661752 | 1.718335  | -2.267137 |
| H | 1.928634  | -1.198985 | -1.222375 |

Hg(OH)<sub>2</sub> with 24 water molecules (apical)

E = -2139.097849

G = -2138.535485

|    |           |           |           |
|----|-----------|-----------|-----------|
| O  | 0.371234  | 2.156290  | 1.722085  |
| O  | 1.251399  | 2.802109  | -0.649141 |
| Hg | -0.098198 | 0.695906  | -1.487242 |
| O  | -1.236440 | -1.488905 | -0.057656 |

|   |           |           |           |
|---|-----------|-----------|-----------|
| O | -0.553941 | -0.256982 | -3.943656 |
| O | 1.719816  | -0.293162 | -1.626122 |
| O | -1.922192 | 1.615708  | -1.226634 |
| O | -1.288260 | 1.940080  | -5.133153 |
| O | -3.544552 | -0.568205 | 0.850908  |
| O | 3.638760  | 1.701159  | -1.719045 |
| O | 3.202916  | 1.789889  | -4.280639 |
| O | -2.163906 | -1.929091 | -2.648935 |
| O | -0.814535 | -4.212668 | -2.687390 |
| O | -0.421336 | -4.035173 | 0.064089  |
| O | 0.736818  | -0.536653 | 1.831916  |
| O | 2.106264  | -0.704539 | -4.316664 |
| O | 3.424900  | -2.990200 | -4.094605 |
| O | 4.204349  | 4.366204  | -2.547685 |
| O | -3.474756 | 2.400081  | -3.455093 |
| O | 1.465967  | 4.829750  | -2.496637 |
| O | 1.001054  | 3.450965  | -4.617531 |
| O | 1.613972  | -3.234370 | -1.865022 |
| O | -4.020682 | 0.146204  | -1.975852 |
| O | 5.176562  | -0.443329 | -0.815072 |
| O | 2.999192  | -1.570180 | 0.270555  |
| O | 5.801280  | -2.137028 | -2.960879 |
| O | -2.434328 | 1.997199  | 1.309729  |
| H | -0.604263 | 2.190605  | 1.738826  |
| H | 0.579001  | 1.200735  | 1.850397  |
| H | 0.044816  | -0.908553 | 1.253410  |
| H | 1.568855  | -0.934425 | 1.529687  |
| H | -1.038717 | -2.449545 | 0.107843  |
| H | -2.104533 | -1.244570 | 0.376173  |
| H | -4.013170 | -0.390300 | 0.016825  |
| H | -3.285924 | 0.313037  | 1.187225  |
| H | -0.817713 | -4.420209 | -0.737291 |
| H | 0.482140  | -3.853122 | -0.242747 |
| H | -2.267976 | 2.011233  | 0.327696  |
| H | -2.971955 | 2.769203  | 1.513525  |

|   |           |           |           |
|---|-----------|-----------|-----------|
| H | 2.167429  | 2.487678  | -0.740433 |
| H | 0.962134  | 2.651294  | 0.303224  |
| H | -1.419081 | -3.426961 | -2.789945 |
| H | -0.981371 | -4.802002 | -3.429101 |
| H | 0.328191  | -0.521171 | -4.289769 |
| H | -0.857105 | 0.540305  | -4.474480 |
| H | -1.847534 | -1.740238 | -1.734068 |
| H | -1.608756 | -1.344322 | -3.229778 |
| H | 2.418218  | -1.106393 | -0.399351 |
| H | 2.917267  | -2.504984 | 0.037351  |
| H | 1.521503  | -2.270000 | -1.939714 |
| H | 0.816725  | -3.606345 | -2.310048 |
| H | 1.112639  | 4.028178  | -3.785989 |
| H | 1.113801  | 4.044025  | -5.368292 |
| H | 2.448821  | 4.844389  | -2.489622 |
| H | 1.239859  | 4.255940  | -1.734209 |
| H | 2.039853  | -0.600466 | -3.342182 |
| H | 2.605725  | -1.563411 | -4.419234 |
| H | 4.350179  | 1.077729  | -1.464586 |
| H | 3.532617  | 1.700293  | -2.726041 |
| H | -3.219972 | 0.598291  | -1.608063 |
| H | -3.651295 | -0.670929 | -2.363195 |
| H | 5.883407  | -0.307568 | -0.174884 |
| H | 4.447094  | -0.909917 | -0.323220 |
| H | -0.564338 | 2.562101  | -4.911708 |
| H | -2.085779 | 2.229761  | -4.650995 |
| H | 2.422995  | 2.366123  | -4.449660 |
| H | 2.900191  | 0.882330  | -4.517805 |
| H | 5.624330  | -1.533573 | -2.211649 |
| H | 6.267224  | -1.603724 | -3.612349 |
| H | -4.203202 | 3.017278  | -3.570417 |
| H | -3.869940 | 1.557881  | -3.130777 |
| H | 4.177286  | 3.534698  | -2.040442 |
| H | 4.375424  | 4.065367  | -3.448055 |
| H | 2.919055  | -3.329032 | -3.335298 |

|   |           |           |           |
|---|-----------|-----------|-----------|
| H | 4.301286  | -2.750210 | -3.721023 |
| H | 2.379620  | 0.440459  | -1.611974 |
| H | -2.103600 | 2.238627  | -1.951745 |

$\text{HgCl}_3^-$

E = -198.864847

G = -198.897980

|    |           |          |           |
|----|-----------|----------|-----------|
| Hg | -0.378983 | 0.000000 | -0.026596 |
| Cl | 0.724530  | 0.000000 | 2.172291  |
| Cl | 0.981475  | 0.000000 | -2.074880 |
| Cl | -2.836249 | 0.000000 | -0.140193 |

$\text{HgCl}_3^-$  with 3 water molecules

E = -428.088753

G = -428.063109

|    |           |           |           |
|----|-----------|-----------|-----------|
| Hg | 0.099539  | 0.002445  | 0.034402  |
| Cl | 2.474451  | -0.764644 | -0.418012 |
| Cl | -0.541587 | 2.226593  | -0.807559 |
| Cl | -1.287840 | -1.573525 | 1.338774  |
| O  | -3.591482 | 0.490350  | -0.279607 |
| H  | -2.910920 | 1.133062  | -0.517737 |
| H  | -3.126454 | -0.123429 | 0.304501  |
| O  | -0.256173 | -2.032277 | -1.842384 |
| H  | 0.692179  | -2.094893 | -1.652054 |
| H  | -0.686327 | -2.428824 | -1.071263 |
| O  | 1.768100  | 1.752965  | 1.640691  |
| H  | 2.372301  | 1.192228  | 1.130619  |
| H  | 1.367135  | 2.334728  | 0.979699  |



HgCl<sub>3</sub><sup>-</sup> with 6 water molecules

E = -657.343371

G = -657.242121

|    |           |           |           |
|----|-----------|-----------|-----------|
| O  | -3.068885 | -1.183378 | -0.999923 |
| Cl | -1.452721 | -1.604203 | 1.865195  |
| Hg | -0.071696 | -0.068077 | 0.295891  |
| Cl | -1.170432 | 1.707734  | -1.087455 |
| Cl | 2.405681  | -0.666578 | 0.459126  |
| O  | -0.399535 | -1.773155 | -1.546061 |
| O  | 2.556183  | 2.257042  | 1.846451  |
| H  | -2.876437 | -0.242310 | -1.133334 |
| H  | -2.922304 | -1.315722 | -0.047652 |
| H  | -0.100474 | -2.555264 | -1.032570 |
| H  | -1.378412 | -1.755979 | -1.491508 |
| H  | 2.850704  | 1.355436  | 1.634820  |
| H  | 2.357214  | 2.617957  | 0.953955  |
| O  | 0.652745  | -3.551808 | 0.307325  |
| H  | 1.418749  | -2.964371 | 0.410011  |
| H  | 0.034246  | -3.221199 | 0.982521  |
| O  | 1.895014  | 2.826375  | -0.809681 |
| H  | 2.229086  | 2.002796  | -1.187084 |
| H  | 0.928544  | 2.726414  | -0.886025 |
| O  | 0.037100  | 1.457834  | 2.344322  |
| H  | 0.968823  | 1.797501  | 2.298697  |
| H  | 0.024493  | 0.759116  | 3.008777  |

HgCl<sub>3</sub><sup>-</sup> with 9 water molecules

E = -886.593284

G = -886.421265

|    |           |           |           |
|----|-----------|-----------|-----------|
| O  | -2.769127 | -1.512860 | -1.483306 |
| O  | -0.033225 | -1.658732 | -1.729180 |
| Hg | -0.126408 | -0.166198 | 0.457076  |
| O  | 0.244228  | 1.443216  | 2.288034  |
| Cl | -1.461429 | -2.035762 | 1.629861  |
| Cl | -1.476730 | 1.445904  | -0.894609 |
| Cl | 2.307130  | -1.011742 | 0.856281  |
| O  | 2.506463  | 2.327219  | 1.188560  |
| O  | 0.717492  | -3.734515 | -0.102482 |
| O  | 1.635603  | 2.500432  | -1.378451 |
| H  | -2.736758 | -0.542816 | -1.436911 |
| H  | -2.762453 | -1.782134 | -0.550809 |
| H  | 0.226851  | -2.504502 | -1.293944 |
| H  | -1.012538 | -1.685773 | -1.825315 |
| H  | 2.924721  | 1.455045  | 1.155716  |
| H  | 2.229396  | 2.478901  | 0.247643  |
| H  | 1.456710  | -3.209567 | 0.245275  |
| H  | 0.003894  | -3.531827 | 0.527951  |
| H  | 1.836650  | 1.642437  | -1.820794 |
| H  | 0.668432  | 2.498235  | -1.315919 |
| H  | 1.090726  | 1.873240  | 1.979712  |
| H  | 0.474064  | 0.798187  | 2.995416  |
| O  | 2.157156  | -0.037241 | -2.344205 |
| H  | 1.329362  | -0.557985 | -2.362946 |
| H  | 2.587223  | -0.375227 | -1.544919 |
| O  | -2.475764 | 2.386765  | 2.286448  |
| H  | -2.595525 | 2.213775  | 1.345297  |
| H  | -1.526530 | 2.219121  | 2.402510  |
| O  | 0.767255  | -0.788104 | 3.809528  |
| H  | 1.433264  | -1.098319 | 3.175244  |
| H  | -0.037156 | -1.250544 | 3.522299  |

HgCl<sub>3</sub><sup>-</sup> with 12 water molecules

E = -1115.845414

G = -1115.599281

|    |           |           |           |
|----|-----------|-----------|-----------|
| O  | -3.227826 | -1.187799 | -1.051748 |
| O  | -0.690979 | -1.941832 | -1.444941 |
| Hg | -0.069535 | -0.291292 | 0.384752  |
| Cl | 2.475653  | -0.929383 | 0.091017  |
| O  | 0.426683  | 1.189210  | 2.331158  |
| Cl | -0.621840 | -2.037293 | 2.204002  |
| Cl | -1.203829 | 1.399831  | -1.065613 |
| O  | 1.363557  | 3.403333  | 1.136877  |
| O  | 2.746189  | 2.276642  | -0.752446 |
| O  | 0.624665  | -3.909178 | -0.061941 |
| O  | 2.130658  | -0.666429 | 3.330071  |
| O  | 1.398348  | -0.947635 | -3.056964 |
| O  | -2.337463 | 1.745725  | 2.637159  |
| H  | -3.022098 | -0.318577 | -1.424233 |
| H  | -3.379982 | -0.973839 | -0.095243 |
| H  | -0.386668 | -2.786952 | -1.043358 |
| H  | -1.673572 | -1.839467 | -1.318983 |
| H  | 1.988124  | 3.979069  | 1.587852  |
| H  | 1.864887  | 3.012834  | 0.349282  |
| H  | 1.443545  | -3.392462 | -0.094273 |
| H  | 0.229812  | -3.623055 | 0.781366  |
| H  | 2.887832  | 1.365144  | -0.449183 |
| H  | 2.280155  | 2.159859  | -1.626957 |
| H  | 0.846554  | 2.013670  | 1.983843  |
| H  | 1.109423  | 0.652800  | 2.802584  |
| H  | 0.547928  | -1.266551 | -2.694610 |
| H  | 1.998967  | -1.074992 | -2.307296 |
| H  | -2.192087 | 2.548343  | 2.093719  |
| H  | -1.425480 | 1.442385  | 2.788994  |
| H  | 2.542386  | -0.841085 | 2.466015  |
| H  | 1.387877  | -1.293767 | 3.336964  |
| O  | 1.363529  | 1.804412  | -2.999550 |

|   |           |           |           |
|---|-----------|-----------|-----------|
| H | 0.478245  | 1.920736  | -2.620334 |
| H | 1.403452  | 0.827015  | -3.134760 |
| O | -3.486146 | -0.521648 | 1.581171  |
| H | -2.873856 | -1.140394 | 2.005069  |
| H | -3.159912 | 0.360938  | 1.886236  |
| O | -1.493504 | 3.878719  | 0.969567  |
| H | -1.637221 | 3.323427  | 0.187673  |
| H | -0.523293 | 3.849993  | 1.060343  |

**Fig 1. Optimized clathrate structure**

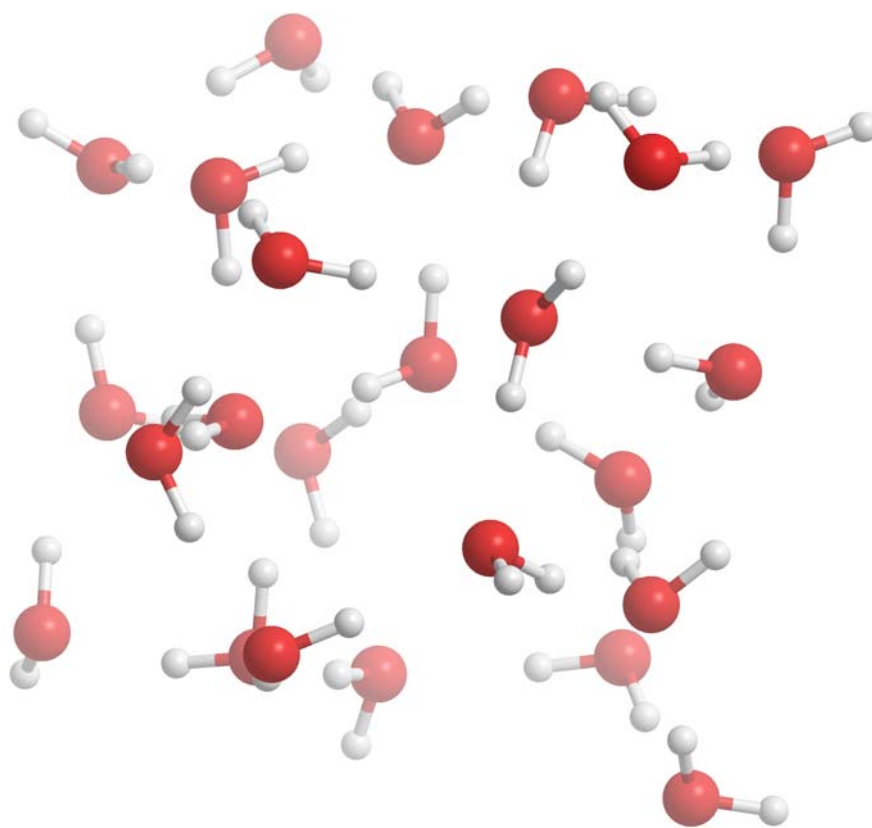

Supplement: c1cp22154j.pdf [file c1cp22154j.pdf]
